# Supplementary material for: Toward Male Individualization with Rapidly Mutating Y-Chromosomal Short Tandem Repeats
Source: PubMed Central journal article supplement (PMC4145662; doi:10.1002/humu.22599), 2014-06-10
Supplement: humu0035-1021-SD1.pdf [file humu0035-1021-SD1.pdf]

**Supp. Table S1. RM Y-STR Primer sequences and concentrations used in three multiplex PCRs**

| <b>Multiplex</b> | <b>Primers</b>           | <b>Sequence 5' - 3'</b>             | <b>Concentration</b> |
|------------------|--------------------------|-------------------------------------|----------------------|
| <b>RM 1</b>      | DYS576 F                 | 6-FAM-TTGGGCTGAGGAGTTCAATC          | 0.1 $\mu$ M          |
|                  | DYS576 R                 | GGCAGTCTCATTTCCTGGAG                | 0.1 $\mu$ M          |
|                  | DYS570 F                 | TAMRA-<br>GAACTGTCTACAATGGCTCACG    | 0.3 $\mu$ M          |
|                  | DYS570 R                 | TCAGCATAGTCAAGAAACCAGACA            | 0.3 $\mu$ M          |
|                  | DYF387S1 F               | JOE-GCCTGGGTGACAGAGCTAGA            | 0.2 $\mu$ M          |
|                  | DYF387S1 R               | GCCACAGTGTGAGAAGTGTGA               | 0.2 $\mu$ M          |
|                  | DYF399S1 F               | 6-FAM-GGGTTTTACACCAGTTTGCAT         | 0.4 $\mu$ M          |
|                  | DYF399S1 R               | CCATGTTTTGGGACATTCT                 | 0.4 $\mu$ M          |
| <b>RM 2</b>      | DYS626 F                 | 6-FAM-<br>GCAAGACCCCATAGCAAAAG      | 0.2 $\mu$ M          |
|                  | DYS626 R                 | AAGAAGAATTTGGGACATGTTT              | 0.2 $\mu$ M          |
|                  | DYS627 F                 | JOE-CTAGGTGACAGCGCAGGATT            | 0.2 $\mu$ M          |
|                  | DYS627 R                 | GGATAATGAGCAAATGGCAAG               | 0.2 $\mu$ M          |
|                  | DYS526 F                 | 6-FAM-<br>TCTGGTGAAGTATCCAAACC      | 0.2 $\mu$ M          |
|                  | DYS526 R                 | GGGTACTTCGCCAGAAGGT                 | 0.2 $\mu$ M          |
|                  | DYS518 F                 | TAMRA-<br>GGCAACACAAGTGAAACTGC      | 0.2 $\mu$ M          |
|                  | DYS518 R                 | TCAGCTCTTACCATGGGTGAT               | 0.2 $\mu$ M          |
| <b>RM 3</b>      | DYS612 F                 | 6-FAM-CCCCATGCCAGTAAGAATA           | 0.15 $\mu$ M         |
|                  | DYS612 R                 | GTGAGGGAAGGCAAAAGAAAA               | 0.15 $\mu$ M         |
|                  | DYF404S1 F               | JOE-<br>GGCTTAAGAAATTTCAACGCATA     | 0.15 $\mu$ M         |
|                  | DYF404S1 R               | CCATGATGGAACAATTGCAG                | 0.15 $\mu$ M         |
|                  | DYS449 F                 | 6-FAM-<br>TGAATATTTCCCTTAACTTGTGTGA | 0.075 $\mu$ M        |
|                  | DYS449 R                 | CCATTGCACTCTAGGTTGGAC               | 0.075 $\mu$ M        |
|                  | DYS547 F                 | 6-FAM-<br>TCCATGTTACTGCAAATACAC     | 0.3 $\mu$ M          |
|                  | DYS547 R                 | TGACAGAGCATAAACGTGTC                | 0.3 $\mu$ M          |
| DYF403S1 F       | JOE-CAAATTCATGTGGATAATGA | 0.5 $\mu$ M                         |                      |
| DYF403S1 R       | ACAGAGCAGGATTCCATCTA     | 0.5 $\mu$ M                         |                      |

**Supp. Table S2. Reaction composition and conditions for the three RM Y-STR multiplexes used**

| Multiplex | Multiplex Component             | Volume ( $\mu$ l per 10 $\mu$ l reaction) | Cycling parameters                                                              |
|-----------|---------------------------------|-------------------------------------------|---------------------------------------------------------------------------------|
| RM 1      | Qiagen Multiplex PCR Master Mix | 5                                         | 94°C<br>10min<br>94°C 30sec<br>65°C -1°C/cycle 30sec<br>10x<br>72°C 60sec       |
|           | DYS576 F+R                      | 0.1                                       |                                                                                 |
|           | DYF387S1 F+R                    | 0.2                                       |                                                                                 |
|           | DYS570 F+R                      | 0.3                                       |                                                                                 |
|           | DYF399S1 F+R                    | 0.4                                       |                                                                                 |
|           | Water                           | 3                                         |                                                                                 |
|           | Template                        | 1                                         |                                                                                 |
| RM 2      | Qiagen Multiplex PCR Master Mix | 5                                         | 94°C 30sec<br>50°C 30sec<br>25x<br>72°C 60sec<br>60°C<br>45min<br>15°C $\infty$ |
|           | DYS526 F+R                      | 0.2                                       |                                                                                 |
|           | DYS626 F+R                      | 0.2                                       |                                                                                 |
|           | DYS627 F+R                      | 0.2                                       |                                                                                 |
|           | DYS518 F+R                      | 0.2                                       |                                                                                 |
|           | Water                           | 3.2                                       |                                                                                 |
|           | Template                        | 1                                         |                                                                                 |
| RM 3      | Qiagen Multiplex PCR Master Mix | 5                                         | 60°C<br>45min<br>15°C $\infty$                                                  |
|           | DYS612 F+R                      | 0.15                                      |                                                                                 |
|           | DYF404S1 F+R                    | 0.15                                      |                                                                                 |
|           | DYS449 F+R                      | 0.075                                     |                                                                                 |
|           | DYS547 F+R                      | 0.3                                       |                                                                                 |
|           | DYF403S1 F+R                    | 0.5                                       |                                                                                 |
|           | Water                           | 2.825                                     |                                                                                 |
| Template  | 1                               |                                           |                                                                                 |

Supp. Table S3. RM Y-STR repeat structure, allelic designations and control 007 genotype

| RM Y-STR         | Repeat Structure                                                                                                                                                          | Allele Designation | Control DNA 007 genotype | Allele Range Observed | Mutation Rate*        |
|------------------|---------------------------------------------------------------------------------------------------------------------------------------------------------------------------|--------------------|--------------------------|-----------------------|-----------------------|
| <b>DYF387S1</b>  | (AAAG) <sub>3</sub> (GTAG) <sub>1</sub> (GAAG) <sub>4</sub> N <sub>20</sub> (GAAG) <sub>n</sub> (AAAG) <sub>o</sub>                                                       | 13+n+o             | <b>35, 37</b>            | <b>28-45.2</b>        | 1.59x10 <sup>-2</sup> |
| <b>DYS399S1</b>  | (GAAA) <sub>3</sub> N <sub>7-8</sub> (GAAA) <sub>n</sub>                                                                                                                  | 5+n                | <b>24, 26.1</b>          | <b>14-31.3</b>        | 7.73x10 <sup>-2</sup> |
| <b>DYF403S1a</b> | (TTCT) <sub>n</sub> No(TTCT) <sub>p</sub>                                                                                                                                 | n+o+p              | <b>11, 13, 18</b>        | <b>5-24</b>           | 3.10x10 <sup>-2</sup> |
| <b>DYF403S1b</b> | (TTCT) <sub>n</sub> N <sub>2</sub> (TTCT) <sub>o</sub> (TTCC) <sub>p</sub> (TTCT) <sub>q</sub>                                                                            | n+o+p+q            | <b>51</b>                | <b>38-62</b>          | 1.19x10 <sup>-2</sup> |
| <b>DYF404S1</b>  | (TTTC) <sub>n</sub>                                                                                                                                                       | n                  | <b>14, 16</b>            | <b>7-21</b>           | 1.25x10 <sup>-2</sup> |
| <b>DYS449</b>    | (TTTC) <sub>n</sub> N <sub>50</sub> (TTTC) <sub>o</sub>                                                                                                                   | n+o                | <b>30</b>                | <b>23-40</b>          | 1.22x10 <sup>-2</sup> |
| <b>DYS518</b>    | (AAAG) <sub>3</sub> (GAAG) <sub>1</sub> (AAAG) <sub>n</sub> (GGAG) <sub>1</sub> (AAAG) <sub>4</sub> N <sub>6</sub> (AAAG) <sub>o</sub>                                    | 9+n+o              | <b>37</b>                | <b>32-52.2</b>        | 1.84x10 <sup>-2</sup> |
| <b>DYS526a</b>   | (CCTT) <sub>n</sub>                                                                                                                                                       | n                  | <b>14</b>                | <b>7-21</b>           | 2.72x10 <sup>-3</sup> |
| <b>DYS526b</b>   | (CTTT) <sub>o</sub> (CCTT) <sub>p</sub> N <sub>113</sub> (CCTT) <sub>n</sub>                                                                                              | n+o+p              | <b>36</b>                | <b>29-44</b>          | 1.25x10 <sup>-2</sup> |
| <b>DYS547</b>    | (CCTT) <sub>n</sub> T(CCTC) <sub>o</sub> N <sub>56</sub> (TTTC) <sub>p</sub> N <sub>10</sub> (CCTT) <sub>4</sub> (TCTC) <sub>1</sub> (TTTC) <sub>q</sub>                  | n+o+p+5+q          | <b>49</b>                | <b>39-57</b>          | 2.36x10 <sup>-2</sup> |
| <b>DYS570</b>    | (TTTC) <sub>n</sub>                                                                                                                                                       | n                  | <b>17</b>                | <b>10-24</b>          | 1.24x10 <sup>-2</sup> |
| <b>DYS576</b>    | (AAAG) <sub>n</sub>                                                                                                                                                       | n                  | <b>19</b>                | <b>11-23</b>          | 1.43x10 <sup>-2</sup> |
| <b>DYS612</b>    | (CCT) <sub>5</sub> (CTT) <sub>1</sub> (TCT) <sub>4</sub> (CCT) <sub>1</sub> (TCT) <sub>n</sub>                                                                            | 11+n               | <b>37</b>                | <b>25-43</b>          | 1.45x10 <sup>-2</sup> |
| <b>DYS626</b>    | (GAAA) <sub>n</sub> N <sub>24</sub> (GAAA) <sub>3</sub> N <sub>6</sub> (GAAA) <sub>5</sub> (AAA) <sub>1</sub> (GAAA) <sub>o</sub> (GAAG) <sub>1</sub> (GAAA) <sub>3</sub> | n+10+o             | <b>30</b>                | <b>22-52</b>          | 1.22x10 <sup>-2</sup> |
| <b>DYS627</b>    | (AGAG) <sub>3</sub> (AAAG) <sub>n</sub>                                                                                                                                   | 3+n                | <b>21</b>                | <b>12-27</b>          | 1.23x10 <sup>-2</sup> |

Segments in **bold** are not counted in the allele designation.

\* Mutation rates from Ballantyne et al., 2010

**Supp. Table S4. RM Y-STR haplotype characteristics in a global set of 12,272 individuals from 111 populations summarized for population samples ordered according to regional groups**

| <b>Group</b>       | <b>Population</b>          | <b>Number individuals</b> | <b>Number haplotypes</b> | <b>Haplotype diversity</b> | $\theta$   | <b>Average number of locus differences</b> |
|--------------------|----------------------------|---------------------------|--------------------------|----------------------------|------------|--------------------------------------------|
| Sub-Saharan Africa | Bakangos (Angola)          | 25                        | 25                       | 1.0                        | 0          | 16.07                                      |
|                    | Kimbundos (Angola)         | 26                        | 25                       | 0.99692                    | 0.00264550 | 15.76                                      |
|                    | Ovimbundos (Angola)        | 44                        | 44                       | 1.0                        | 0          | 15.79                                      |
|                    | Guinea-Bissau              | 92                        | 91                       | 0.99976                    | 0.00022878 | 16.99                                      |
|                    | Xhosa (South Africa)       | 116                       | 115                      | 0.99985                    | 0.00014486 | 15.50                                      |
| North Africa       | Benghazi (Libya)           | 128                       | 124                      | 0.99938                    | 0.00086889 | 15.47                                      |
|                    | Tripoli (Libya)            | 105                       | 104                      | 0.99982                    | 0.00017634 | 16.29                                      |
|                    | Morocco (Population 1)     | 151                       | 149                      | 0.99982                    | 0.00016752 | 15.45                                      |
|                    | Morocco (Population 2)     | 68                        | 68                       | 1.0                        | 0          | 15.12                                      |
| Middle East        | Turkey                     | 100                       | 100                      | 1.0                        | 0          | 15.26                                      |
| Central Asia       | Afghanistan                | 86                        | 80                       | 0.99836                    | 0.00124160 | 16.18                                      |
| South Asia         | Andhra Pradesh (India)     | 109                       | 109                      | 1.0                        | 0          | 17.00                                      |
|                    | Karnataka (India)          | 97                        | 94                       | 0.99936                    | 0.00056963 | 16.95                                      |
|                    | Kanyakubja Brahmin (India) | 78                        | 74                       | 0.99867                    | 0.00108563 | 16.83                                      |
|                    | Munda (India)              | 68                        | 68                       | 1.0                        | 0          | 16.23                                      |
|                    | Tripuri (India)            | 64                        | 64                       | 1.0                        | 0          | 16.44                                      |
|                    | Punjab (Pakistan)          | 95                        | 85                       | 0.99754                    | 0.00208782 | 17.17                                      |
|                    | Brahui (Pakistan)          | 77                        | 77                       | 1.0                        | 0          | 16.86                                      |
|                    | Pathan (Pakistan)          | 73                        | 73                       | 1.0                        | 0          | 16.44                                      |
| East Asia          | Kanto (Japan)              | 147                       | 147                      | 1.0                        | 0          | 16.79                                      |
|                    | Gunma (Japan)              | 37                        | 35                       | 0.99700                    | 0.00242433 | 16.63                                      |
|                    | Shizuoka (Japan)           | 64                        | 64                       | 1.0                        | 0          | 17.07                                      |

| <b>Group</b>            | <b>Population</b>                    | <b>Number individuals</b> | <b>Number haplotypes</b> | <b>Haplotype diversity</b> | <b><math>\theta</math></b> | <b>Average number of locus differences</b> |
|-------------------------|--------------------------------------|---------------------------|--------------------------|----------------------------|----------------------------|--------------------------------------------|
|                         | Korean (Population 1)                | 200                       | 200                      | 1.0                        | 0                          | 17.20                                      |
|                         | Korean (Population 2)                | 227                       | 226                      | 0.99996                    | 0.00003831                 | 17.22                                      |
|                         | Korean (Population 3)                | 182                       | 182                      | 1.0                        | 0                          | 17.29                                      |
|                         | Bai (China)                          | 110                       | 110                      | 1.0                        | 0                          | 16.65                                      |
| South East Asia         | Thai (Thailand)                      | 120                       | 120                      | 1.0                        | 0                          | 17.40                                      |
|                         | East Timor                           | 110                       | 108                      | 0.99967                    | 0.00031030                 | 17.34                                      |
|                         | Batak (Indonesia)                    | 104                       | 104                      | 1.0                        | 0                          | 16.87                                      |
|                         | Java (Indonesia)                     | 100                       | 98                       | 0.99960                    | 0.00037311                 | 16.38                                      |
|                         | Filipino (Philippines)               | 97                        | 97                       | 1.0                        | 0                          | 14.93                                      |
|                         | Malay (Singapore)                    | 103                       | 103                      | 1.0                        | 0                          | 17.37                                      |
| Aboriginal Australian   |                                      | 100                       | 96                       | 0.99919                    | 0.00068892                 | 16.8                                       |
| Native American         | Tehuelches (Argentina)               | 10                        | 10                       | 1.0                        | 0                          | 16.16                                      |
|                         | Bolivia                              | 99                        | 99                       | 1.0                        | 0                          | 16.78                                      |
|                         | Mocovies (Argentina)                 | 7                         | 7                        | 1.0                        | 0                          | 15.38                                      |
|                         | Pilagás (Argentina)                  | 31                        | 31                       | 1.0                        | 0                          | 14.91                                      |
|                         | Tobas (Argentina)                    | 15                        | 15                       | 1.0                        | 0                          | 14.62                                      |
|                         | Mapuches (Argentina)                 | 13                        | 13                       | 1.0                        | 0                          | 16.58                                      |
|                         | Wichis (Salta Province, Argentina)   | 9                         | 8                        | 0.97222                    | 0.01818182                 | 15.08                                      |
|                         | Wichis (Formosa Province, Argentina) | 14                        | 14                       | 1.0                        | 0                          | 11.38                                      |
|                         | Inuit (Greenland, Population 1)      | 95                        | 92                       | 0.99910                    | 0.00137764                 | 16.90                                      |
|                         | Inuit (Greenland, Population 2)      | 72                        | 69                       | 0.99883                    | 0.00099431                 | 17.01                                      |
| Admixed Native American | Chubut (Argentina)                   | 50                        | 50                       | 1.0                        | 0                          | 16.42                                      |
|                         | Corrientes (Argentina)               | 25                        | 25                       | 1.0                        | 0                          | 16.45                                      |

| Group    | Population                    | Number individuals | Number haplotypes | Haplotype diversity | $\theta$   | Average number of locus differences |
|----------|-------------------------------|--------------------|-------------------|---------------------|------------|-------------------------------------|
|          | Formosa (Argentina)           | 25                 | 25                | 1.0                 | 0          | 16.16                               |
|          | Misiones (Argentina)          | 25                 | 25                | 1.0                 | 0          | 17.15                               |
|          | Rio Negro (Argentina)         | 50                 | 50                | 1.0                 | 0          | 16.69                               |
|          | Salta (Argentina)             | 25                 | 25                | 1.0                 | 0          | 16.59                               |
|          | Rio de Janeiro (Brazil)       | 136                | 136               | 1.0                 | 0          | 19.12                               |
|          | Costa Rica                    | 102                | 102               | 1.0                 | 0          | 17.16                               |
|          | Buenos Aires (Argentina)      | 97                 | 96                | 0.99979             | 0.00020614 | 17.15                               |
|          | Chihuahua (Mexico)            | 81                 | 79                | 0.99938             | 0.00055953 | 16.97                               |
|          | Jalisco (Mexico)              | 80                 | 78                | 0.99937             | 0.00057300 | 17.14                               |
|          | Yucatan (Mexico)              | 68                 | 68                | 1.0                 | 0          | 17.41                               |
| European | Albania                       | 82                 | 81                | 0.99970             | 0.00028686 | 17.00                               |
|          | Tyrol (Austria)               | 130                | 129               | 0.99988             | 0.00011566 | 17.47                               |
|          | Upper Austria                 | 226                | 225               | 0.99996             | 0.00003864 | 17.51                               |
|          | Salzburg (Austria)            | 206                | 205               | 0.99995             | 0.00004645 | 17.59                               |
|          | Belarus                       | 100                | 100               | 1.0                 | 0          | 17.15                               |
|          | Antwerp (Belgium)             | 103                | 103               | 1.0                 | 0          | 16.90                               |
|          | Brabant (Belgium)             | 100                | 100               | 1.0                 | 0          | 17.01                               |
|          | Bosnia                        | 100                | 100               | 1.0                 | 0          | 16.12                               |
|          | Britain                       | 99                 | 99                | 1.0                 | 0          | 16.77                               |
|          | Croatia                       | 112                | 111               | 0.99984             | 0.00015526 | 15.41                               |
|          | Czech Republic (Population 1) | 102                | 102               | 1.0                 | 0          | 17.12                               |
|          | Czech Republic (Population 2) | 133                | 132               | 0.99989             | 0.00011056 | 17.56                               |
|          | Denmark                       | 92                 | 92                | 1.0                 | 0          | 16.81                               |
|          | Estonia                       | 109                | 109               | 1.0                 | 0          | 16.66                               |
|          | Finland (Population 1)        | 103                | 103               | 1.0                 | 0          | 14.28                               |

| <b>Group</b>               | <b>Population</b>               | <b>Number individuals</b> | <b>Number haplotypes</b> | <b>Haplotype diversity</b> | <b><math>\theta</math></b> | <b>Average number of locus differences</b> |
|----------------------------|---------------------------------|---------------------------|--------------------------|----------------------------|----------------------------|--------------------------------------------|
|                            | Finland (Population 2)          | 96                        | 95                       | 0.99978                    | 0.00021039                 | 16.47                                      |
|                            | Berlin (Germany)                | 208                       | 207                      | 0.99995                    | 0.00004557                 | 16.52                                      |
|                            | Cologne (Germany, Population 1) | 97                        | 97                       | 1.0                        | 0                          | 17.37                                      |
|                            | Cologne (Germany, Population 2) | 599                       | 598                      | 0.999994                   | 0.00000555                 | 16.26                                      |
|                            | Leipzig (Germany)               | 219                       | 219                      | 1.0                        | 0                          | 14.16                                      |
|                            | Northern Greece                 | 108                       | 107                      | 0.99983                    | 0.00016681                 | 17.55                                      |
|                            | Hungary                         | 103                       | 103                      | 1.0                        | 0                          | 17.38                                      |
|                            | Piemonte (Italy)                | 50                        | 50                       | 1.0                        | 0                          | 16.79                                      |
|                            | Sicily (Italy)                  | 50                        | 50                       | 1.0                        | 0                          | 17.34                                      |
|                            | Marches (Italy)                 | 100                       | 99                       | 0.99980                    | 0.00019414                 | 17.06                                      |
|                            | Lithuania                       | 84                        | 84                       | 1.0                        | 0                          | 16.78                                      |
|                            | Netherlands                     | 112                       | 112                      | 1.0                        | 0                          | 16.45                                      |
|                            | Norway                          | 152                       | 152                      | 1.0                        | 0                          | 16.81                                      |
|                            | Northern Poland                 | 100                       | 100                      | 1.0                        | 0                          | 17.03                                      |
|                            | Warsaw (Poland)                 | 369                       | 368                      | 0.999985                   | 0.00001457                 | 16.57                                      |
|                            | Wroclaw (Poland)                | 467                       | 467                      | 1.0                        | 0                          | 16.51                                      |
|                            | Latvia                          | 132                       | 132                      | 1.0                        | 0                          | 16.97                                      |
|                            | Slovakia                        | 100                       | 100                      | 1.0                        | 0                          | 17.03                                      |
|                            | Slovenia                        | 128                       | 126                      | 0.99975                    | 0.00023121                 | 17.06                                      |
|                            | Sweden                          | 292                       | 289                      | 0.99993                    | 0.00006777                 | 17.02                                      |
| Switzerland                | 108                             | 108                       | 1.0                      | 0                          | 16.99                      |                                            |
| Kiev (Ukraine)             | 103                             | 103                       | 1.0                      | 0                          | 16.85                      |                                            |
| Galicia (Spain)            | 44                              | 44                        | 1.0                      | 0                          | 17.14                      |                                            |
| Migrant Sub-Saharan Africa | African American (Population 1) | 100                       | 100                      | 1.0                        | 0                          | 16.71                                      |
|                            | Reunion African                 | 57                        | 56                       | 0.99937                    | 0.00058445                 | 14.94                                      |

| <b>Group</b>     | <b>Population</b>               | <b>Number individuals</b> | <b>Number haplotypes</b> | <b>Haplotype diversity</b> | $\theta$   | <b>Average number of locus differences</b> |
|------------------|---------------------------------|---------------------------|--------------------------|----------------------------|------------|--------------------------------------------|
|                  | British African                 | 102                       | 102                      | 1.0                        | 0          | 16.67                                      |
|                  | African American (Population 2) | 312                       | 311                      | 0.99998                    | 0.00002035 | 17.06                                      |
|                  | Danish Somali                   | 92                        | 90                       | 0.99952                    | 0.00043818 | 14.70                                      |
| Migrant Asian    | Reunion Indian                  | 58                        | 58                       | 1.0                        | 0          | 14.76                                      |
|                  | Reunion Creole                  | 92                        | 90                       | 0.99952                    | 0.00043818 | 14.05                                      |
|                  | Singapore Indian                | 102                       | 102                      | 1.0                        | 0          | 17.29                                      |
|                  | British Asian                   | 102                       | 102                      | 1.0                        | 0          | 17.67                                      |
|                  | US Asian                        | 88                        | 88                       | 1.0                        | 0          | 17.49                                      |
|                  | Singapore Han Chinese           | 104                       | 104                      | 1.0                        | 0          | 17.40                                      |
|                  | Hungarian Romani                | 103                       | 101                      | 0.99962                    | 0.00035240 | 16.81                                      |
| Migrant European | US Hispanic                     | 219                       | 218                      | 0.99996                    | 0.00004114 | 17.25                                      |
|                  | US European                     | 345                       | 345                      | 1.0                        | 0          | 16.83                                      |
|                  | Australian European             | 167                       | 167                      | 1.0                        | 0          | 16.96                                      |
| Bhutan           | Monpa                           | 40                        | 31                       | 0.98590                    | 0.00918663 | 12.92                                      |
|                  | Lhokpu                          | 38                        | 26                       | 0.97724                    | 0.02064797 | 7.72                                       |
| Biaka Pygmy      |                                 | 101                       | 94                       | 0.99822                    | 0.00225545 | 17.50                                      |



**Supp. Table S5. Comparison of Yfiler and RM Y-STR haplotype characteristics in a global set of 7,784 individuals from 65 populations summarized for population samples ordered according to regional groups**

| <b>Group</b>    | <b>Population</b>          | <b>Number individuals</b> | <b>Number Yfiler haplotypes</b> | <b>Number RM Y-STR haplotypes</b> | <b>Yfiler haplotype diversity</b> | <b>RM Y-STR haplotype diversity</b> | <b>Yfiler Average % of differing loci</b> | <b>RM Y-STR Average % of differing loci</b> |
|-----------------|----------------------------|---------------------------|---------------------------------|-----------------------------------|-----------------------------------|-------------------------------------|-------------------------------------------|---------------------------------------------|
| North Africa    | Benghazi (Libya)           | 128                       | 116                             | 124                               | 0.997047                          | 0.999385                            | 58%                                       | 74%                                         |
|                 | Morocco (Population 2)     | 65                        | 59                              | 65                                | 0.996394                          | 1.0                                 | 55%                                       | 72%                                         |
| Middle East     | Afghanistan                | 83                        | 67                              | 77                                | 0.992507                          | 0.998237                            | 63%                                       | 77%                                         |
| South Asia      | Andhra Pradesh (India)     | 109                       | 107                             | 109                               | 0.99966                           | 1.0                                 | 66%                                       | 81%                                         |
|                 | Karnataka (India)          | 97                        | 89                              | 94                                | 0.998282                          | 0.999356                            | 67%                                       | 81%                                         |
|                 | Kanyakubja Brahmin (India) | 78                        | 72                              | 74                                | 0.997669                          | 0.998668                            | 63%                                       | 80%                                         |
|                 | Munda (India)              | 68                        | 53                              | 68                                | 0.988586                          | 1.0                                 | 49%                                       | 77%                                         |
|                 | Tripuri (India)            | 64                        | 61                              | 64                                | 0.998512                          | 1.0                                 | 61%                                       | 78%                                         |
|                 | Punjab (Pakistan)          | 81                        | 71                              | 74                                | 0.997068                          | 0.997531                            | 65%                                       | 82%                                         |
| East Asia       | Gunma (Japan)              | 37                        | 36                              | 35                                | 0.998498                          | 0.996997                            | 59%                                       | 79%                                         |
|                 | Shizuoka (Japan)           | 64                        | 63                              | 64                                | 0.999504                          | 1.0                                 | 61%                                       | 81%                                         |
|                 | Korean (Population 1)      | 200                       | 194                             | 200                               | 0.999648                          | 1.0                                 | 65%                                       | 82%                                         |
|                 | Korean (Population 2)      | 227                       | 219                             | 226                               | 0.999532                          | 0.999961                            | 60%                                       | 82%                                         |
|                 | Korean (Population 3)      | 105                       | 103                             | 105                               | 0.999634                          | 1.0                                 | 65%                                       | 83%                                         |
| South East Asia | Batak (Indonesia)          | 100                       | 80                              | 100                               | 0.994343                          | 1.0                                 | 64%                                       | 80%                                         |
|                 | Java (Indonesia)           | 100                       | 95                              | 98                                | 0.998081                          | 0.999596                            | 63%                                       | 78%                                         |

| <b>Group</b>            | <b>Population</b>                    | <b>Number individuals</b> | <b>Number Yfiler haplotypes</b> | <b>Number RM Y-STR haplotypes</b> | <b>Yfiler haplotype diversity</b> | <b>RM Y-STR haplotype diversity</b> | <b>Yfiler Average % of differing loci</b> | <b>RM Y-STR Average % of differing loci</b> |
|-------------------------|--------------------------------------|---------------------------|---------------------------------|-----------------------------------|-----------------------------------|-------------------------------------|-------------------------------------------|---------------------------------------------|
| Aboriginal Australian   |                                      | 100                       | 74                              | 96                                | 0.991515                          | 0.999192                            | 68%                                       | 80%                                         |
| Native American         | Tehuelches (Argentina)               | 10                        | 10                              | 10                                | 1                                 | 1.0                                 | 60%                                       | 77%                                         |
|                         | Bolivia                              | 99                        | 93                              | 99                                | 0.998763                          | 1.0                                 | 56%                                       | 80%                                         |
|                         | Pilagás (Argentina)                  | 27                        | 23                              | 27                                | 0.981481                          | 1.0                                 | 45%                                       | 71%                                         |
|                         | Tobas (Argentina)                    | 15                        | 12                              | 15                                | 0.971429                          | 1.0                                 | 36%                                       | 70%                                         |
|                         | Mapuches (Argentina)                 | 13                        | 11                              | 13                                | 0.974359                          | 1.0                                 | 51%                                       | 79%                                         |
|                         | Wichis (Salta Province, Argentina)   | 9                         | 8                               | 8                                 | 0.972222                          | 0.972222                            | 40%                                       | 72%                                         |
|                         | Wichis (Formosa Province, Argentina) | 13                        | 7                               | 13                                | 0.794872                          | 1.0                                 | 20%                                       | 54%                                         |
|                         | Inuit (Greenland, Population 1)      | 93                        | 72                              | 90                                | 0.990182                          | 0.999065                            | 66%                                       | 80%                                         |
| Admixed Native American | Salta (Argentina)                    | 6                         | 6                               | 6                                 | 1                                 | 1.0                                 | 69%                                       | 82%                                         |
|                         | Rio de Janeiro (Brazil)              | 123                       | 121                             | 123                               | 0.999733                          | 1.0                                 | 65%                                       | 76%                                         |
|                         | Costa Rica                           | 100                       | 98                              | 100                               | 0.999596                          | 1.0                                 | 67%                                       | 82%                                         |
|                         | Chihuahua (Mexico)                   | 81                        | 75                              | 79                                | 0.99784                           | 0.999383                            | 66%                                       | 81%                                         |
|                         | Jalisco (Mexico)                     | 80                        | 77                              | 78                                | 0.999051                          | 0.999367                            | 66%                                       | 82%                                         |
|                         | Yucatan (Mexico)                     | 68                        | 68                              | 68                                | 1                                 | 1.0                                 | 68%                                       | 83%                                         |

| <b>Group</b> | <b>Population</b>               | <b>Number individuals</b> | <b>Number Yfiler haplotypes</b> | <b>Number RM Y-STR haplotypes</b> | <b>Yfiler haplotype diversity</b> | <b>RM Y-STR haplotype diversity</b> | <b>Yfiler Average % of differing loci</b> | <b>RM Y-STR Average % of differing loci</b> |
|--------------|---------------------------------|---------------------------|---------------------------------|-----------------------------------|-----------------------------------|-------------------------------------|-------------------------------------------|---------------------------------------------|
| European     | Albania                         | 82                        | 76                              | 81                                | 0.997892                          | 0.999699                            | 60%                                       | 81%                                         |
|              | Tyrol (Austria)                 | 130                       | 127                             | 129                               | 0.999642                          | 0.999881                            | 66%                                       | 83%                                         |
|              | Upper Austria                   | 224                       | 218                             | 223                               | 0.99976                           | 0.99996                             | 67%                                       | 83%                                         |
|              | Salzburg (Austria)              | 206                       | 202                             | 205                               | 0.999811                          | 0.999953                            | 67%                                       | 84%                                         |
|              | Belarus                         | 100                       | 99                              | 100                               | 0.999798                          | 1.0                                 | 60%                                       | 82%                                         |
|              | Antwerp (Belgium)               | 103                       | 100                             | 103                               | 0.999429                          | 1.0                                 | 62%                                       | 80%                                         |
|              | Brabant (Belgium)               | 100                       | 98                              | 100                               | 0.999596                          | 1.0                                 | 61%                                       | 81%                                         |
|              | Britain                         | 99                        | 98                              | 99                                | 0.999794                          | 1.0                                 | 59%                                       | 80%                                         |
|              | Croatia                         | 10                        | 10                              | 10                                | 1                                 | 1.0                                 | 43%                                       | 65%                                         |
|              | Czech Republic (Population 1)   | 101                       | 101                             | 101                               | 0.999703                          | 1.0                                 | 62%                                       | 82%                                         |
|              | Czech Republic (Population 2)   | 117                       | 117                             | 116                               | 1                                 | 0.999853                            | 64%                                       | 84%                                         |
|              | Denmark                         | 91                        | 90                              | 91                                | 0.999756                          | 1.0                                 | 63%                                       | 80%                                         |
|              | Finland (Population 2)          | 93                        | 81                              | 92                                | 0.995792                          | 0.999766                            | 64%                                       | 79%                                         |
|              | Berlin (Germany)                | 84                        | 83                              | 84                                | 0.999713                          | 1.0                                 | 64%                                       | 74%                                         |
|              | Cologne (Germany, Population 2) | 594                       | 576                             | 593                               | 0.999881                          | 0.999994                            | 65%                                       | 77%                                         |
|              | Leipzig (Germany)               | 215                       | 212                             | 215                               | 0.99987                           | 1.0                                 | 65%                                       | 67%                                         |
|              | Northern Greece                 | 103                       | 98                              | 102                               | 0.999048                          | 0.99981                             | 66%                                       | 84%                                         |
|              | Hungary                         | 103                       | 100                             | 103                               | 0.999239                          | 1.0                                 | 66%                                       | 83%                                         |

| <b>Group</b>               | <b>Population</b>               | <b>Number individuals</b> | <b>Number Yfiler haplotypes</b> | <b>Number RM Y-STR haplotypes</b> | <b>Yfiler haplotype diversity</b> | <b>RM Y-STR haplotype diversity</b> | <b>Yfiler Average % of differing loci</b> | <b>RM Y-STR Average % of differing loci</b> |
|----------------------------|---------------------------------|---------------------------|---------------------------------|-----------------------------------|-----------------------------------|-------------------------------------|-------------------------------------------|---------------------------------------------|
|                            | Piemonte (Italy)                | 50                        | 48                              | 50                                | 0.998367                          | 1.0                                 | 64%                                       | 80%                                         |
|                            | Marches (Italy)                 | 99                        | 99                              | 98                                | 1                                 | 0.999794                            | 66%                                       | 81%                                         |
|                            | Netherlands                     | 112                       | 112                             | 112                               | 1                                 | 1.0                                 | 61%                                       | 78%                                         |
|                            | Warsaw (Poland)                 | 364                       | 333                             | 363                               | 0.998683                          | 0.999985                            | 58%                                       | 79%                                         |
|                            | Wroclaw (Poland)                | 462                       | 438                             | 462                               | 0.999634                          | 1.0                                 | 58%                                       | 79%                                         |
|                            | Sweden                          | 292                       | 279                             | 289                               | 0.999647                          | 0.999929                            | 65%                                       | 81%                                         |
|                            | Switzerland                     | 108                       | 107                             | 108                               | 0.999827                          | 1.0                                 | 63%                                       | 81%                                         |
| Migrant Sub-Saharan Africa | British African                 | 102                       | 101                             | 102                               | 0.999806                          | 1.0                                 | 60%                                       | 79%                                         |
|                            | African American (Population 2) | 249                       | 246                             | 248                               | 0.999903                          | 0.999968                            | 65%                                       | 81%                                         |
|                            | Danish Somali                   | 91                        | 64                              | 89                                | 0.983394                          | 0.999512                            | 44%                                       | 70%                                         |
| Migrant Asian              | British Asian                   | 102                       | 99                              | 102                               | 0.999418                          | 1.0                                 | 69%                                       | 83%                                         |
|                            | Hungarian Romani                | 103                       | 77                              | 101                               | 0.991338                          | 0.999619                            | 62%                                       | 80%                                         |
| Migrant European           | US Hispanic                     | 131                       | 128                             | 130                               | 0.999648                          | 0.999883                            | 67%                                       | 82%                                         |
|                            | US European                     | 254                       | 249                             | 254                               | 0.999844                          | 1.0                                 | 61%                                       | 80%                                         |
|                            | Australian European             | 167                       | 166                             | 167                               | 0.999928                          | 1.0                                 | 61%                                       | 81%                                         |
| Biaka Pygmy                |                                 | 101                       | 83                              | 94                                | 0.99505                           | 0.998218                            | 65%                                       | 83%                                         |

**Supp. Tables S6, S7, and S8** are available as Excel files under the Supporting Information for this Article.

**Supp. Table S6. RM Y-STR and Yfiler haplotypes obtained from the 12,272 individuals in 111 global populations**

**Supp. Table S7. Allele frequencies and ranges for individual populations, regional groups, and the complete dataset for each RM Y-STR marker**

**Supp. Table S8. RM Y-STR and Yfiler haplotypes for male relative pairs**
